# Supplementary material for: Normalized Clinical Severity Scores Reveal a Correlation between X Chromosome Inactivation and Disease Severity in Rett Syndrome
Source: Genes (Basel). 2024 May 8;15(5):594. doi: 10.3390/genes15050594 (PMC11120815; doi:10.3390/genes15050594)
Supplement: Supplementary file 1 [file genes-15-00594-s001.zip › Supplementary File S2.csv]

participant_id	childs_gender	diagnosis	grouping3	baseline_age	baseline_CSS	mean_predicted_CSS	nCSS	Percent_Paternal_Inactivation
11	Female	Classic	R168X	3.1567	20	24	0.23	NA
41	Female	Classic	LargeDel	5.1034	28	29	0.72	NA
53	Female	Variant	CTT	10.8747	17	16	0.21	NA
58	Female	Classic	CTT	3.9644	19	24	0.63	NA
63	Female	Classic	LargeDel	3.5565	16	20	0.25	NA
65	Female	Classic	R168X	8.6105	24	29	0.61	NA
82	Female	Classic	CTT	11.2334	23	24	0.63	NA
104	Female	Variant	CTT	3.1458	6	18	0.28	NA
107	Female	Classic	T158M	4.052	19	23	0.4	73
113	Female	Variant	T158M	3.7974	25	30	0.83	NA
126	Female	Other MECP2 mutation-positive Non-Rett (including normal phenotype)	CTT	4.6133	8	9	0	NA
135	Female	Classic	R306C	15.5729	20	19	0.39	NA
142	Female	Classic	earlytrunc	6.1246	31	31	0.79	NA
143	Female	Classic	R255X	10.9596	33	34	0.85	NA
144	Female	Classic	R168X	7.4661	23	25	0.3	NA
152	Female	Variant	CTT	3.8412	10	9	0	NA
154	Female	Atypical/variant unspecified Rett syndrome	R133C	12.5832	4	5	0	NA
159	Female	Variant	R133C	7.8604	17	16	0.23	NA
160	Female	Classic	LargeDel	2.5654	22	22	0.32	77
165	Female	Classic	R306C	3.4552	13	19	0.39	76
169	Female	Variant	R255X	17.5524	47	42	1	NA
170	Female	Classic	R133C	9.5003	30	31	0.97	NA
171	Female	Classic	CTT	9.5359	19	20	0.36	NA
184	Female	Classic	R294X	7.9261	11	14	0.11	NA
187	Female	Classic	R255X	6.9897	28	28	0.5	NA
196	Female	Classic	CTT	17.0376	15	13	0.07	NA
201	Female	Classic	R168X	6.3737	25	28	0.55	NA
205	Female	Variant	CTT	1.7577	26	43	1	NA
208	Female	Classic	R306C	9.1143	16	16	0.29	52
209	Female	Atypical/variant unspecified Rett syndrome	CTT	21.5305	11	9	0	NA
213	Female	Classic	R133C	4.2136	10	13	0.09	NA
234	Female	Classic	R306C	5.5003	11	16	0.29	NA
235	Female	Variant	CTT	17.8097	29	25	0.7	NA
236	Female	Classic	R306C	16.9144	25	23	0.73	NA
241	Female	Classic	R270X	4.0383	25	32	0.7	NA
257	Female	Classic	R255X	2.6366	24	19	0.11	NA
259	Female	Classic	R306C	6.8255	12	15	0.18	NA
264	Female	Classic	R133C	2.7159	10	22	0.64	47
287	Female	Classic	R255X	10.037	34	32	0.7	NA
288	Female	Classic	R133C	4.835	12	19	0.43	NA
298	Female	Classic	CTT	6.2067	9	10	0.01	NA
299	Female	Classic	R294X	3.1157	15	22	0.63	NA
301	Female	Classic	LargeDel	4.0958	28	26	0.53	NA
326	Female	Classic	LargeDel	2.7817	15	19	0.22	92
333	Female	Classic	R255X	3.165	20	24	0.23	NA
337	Female	Classic	R106W	2.3107	21	34	0.91	NA
355	Female	Classic	LargeDel	3.5017	24	34	0.87	NA
363	Female	Classic	R168X	19.8823	41	37	0.96	91
364	Female	Classic	CTT	10.3107	12	14	0.1	NA
374	Female	Classic	R255X	24.115	38	34	0.85	NA
377	Female	Classic	R306C	4.7639	12	21	0.54	NA
397	Female	Classic	CTT	10.1218	32	34	0.99	NA
398	Female	Classic	LargeDel	3.8494	33	36	0.95	NA
399	Female	Atypical/variant unspecified Rett syndrome	R270X	4.7365	26	29	0.54	NA
405	Female	Classic	earlytrunc	5.1444	33	30	0.72	NA
408	Female	Classic	LargeDel	10.1328	21	23	0.4	NA
411	Female	Classic	earlytrunc	14.8255	23	24	0.36	NA
412	Female	Classic	R270X	2.2012	25	29	0.54	NA
413	Female	Classic	LargeDel	4.1916	17	23	0.4	NA
419	Female	Classic	earlytrunc	18.1793	24	21	0.22	NA
424	Female	Classic	R133C	5.2567	20	24	0.77	NA
427	Female	Classic	earlytrunc	3.7125	21	25	0.44	NA
457	Female	Variant	R294X	19.4579	16	17	0.22	NA
461	Female	Classic	LargeDel	6.8337	21	22	0.32	77
465	Female	Classic	T158M	4.3094	18	17	0.14	NA
469	Female	Classic	R168X	15.2909	24	22	0.16	NA
471	Female	Classic	LargeDel	4.0876	24	23	0.4	NA
476	Female	Classic	R106W	7.9973	31	32	0.74	69
489	Female	Other Non-Rett	R255X	1.7084	26	40	0.99	NA
493	Female	Variant	R294X	11.6851	20	21	0.6	NA
514	Female	Classic	R255X	5.9932	19	24	0.23	NA
530	Female	Classic	R294X	10.8857	18	18	0.32	NA
532	Female	Classic	R168X	6.0698	34	35	0.9	NA
537	Female	Classic	R168X	2.2094	30	37	0.96	26
538	Female	Classic	CTT	2.412	15	25	0.7	44
542	Female	Classic	R133C	6.0479	23	26	0.86	NA
545	Female	Classic	R306C	5.922	17	17	0.35	NA
546	Female	Classic	LargeDel	4.4216	25	27	0.58	NA
551	Female	Classic	R168X	6.5051	21	23	0.2	NA
561	Female	Other MECP2 mutation-positive Non-Rett (including normal phenotype)	R306C	5.5031	11	15	0.18	NA
565	Female	Classic	T158M	7.0062	32	36	0.98	NA
570	Female	Classic	earlytrunc	1.9466	17	29	0.63	NA
572	Female	Classic	R270X	3.4442	27	32	0.7	NA
603	Female	Classic	R270X	7.6879	25	27	0.37	NA
608	Female	Classic	R270X	2.3162	19	34	0.84	NA
624	Female	Classic	R294X	5.2567	10	17	0.22	74
636	Female	Classic	R306C	8.668	12	15	0.18	73
648	Female	Classic	R168X	4.2272	28	28	0.55	62
666	Female	Classic	R255X	22.1875	37	33	0.75	NA
672	Female	Classic	R270X	11.7016	27	27	0.37	83
684	Female	Classic	CTT	15.4223	31	30	0.9	NA
689	Female	Classic	R255X	7.6769	12	14	0.03	77
692	Female	Classic	T158M	3.488	14	22	0.33	NA
696	Female	Classic	R306C	5.9849	13	13	0.09	NA
699	Female	Classic	R294X	22.6502	18	20	0.54	NA
703	Female	Classic	earlytrunc	6.1766	19	18	0.12	NA
706	Female	Classic	R133C	8.4791	28	28	0.89	NA
707	Female	Classic	R168X	3.436	28	29	0.61	NA
714	Female	Classic	R133C	5.7687	21	24	0.77	NA
722	Female	Classic	R133C	24.4079	20	16	0.23	NA
741	Female	Classic	R255X	6.2231	20	23	0.18	NA
743	Female	Classic	R255X	1.8973	23	28	0.5	NA
747	Female	Classic	R294X	9.9384	27	26	0.78	NA
756	Female	Classic	earlytrunc	7.5756	27	30	0.72	NA
763	Female	Other Non-Rett	CTT	17.7522	3	4	0	NA
770	Female	Other MECP2 mutation-positive Non-Rett (including normal phenotype)	R133C	3.4689	11	16	0.23	63
775	Female	Classic	R255X	7.0801	33	38	0.95	NA
781	Female	Classic	R294X	13.0897	20	19	0.38	NA
784	Female	Classic	T158M	4.8843	14	17	0.14	NA
790	Female	Classic	R270X	9.2539	39	37	0.94	NA
813	Female	Classic	R270X	4.4326	14	16	0.01	NA
820	Female	Classic	earlytrunc	9.4976	23	28	0.55	NA
834	Female	Variant	CTT	18.8337	29	26	0.76	NA
835	Female	Classic	R168X	2.6585	18	24	0.23	NA
839	Female	Classic	T158M	2.6475	15	20	0.23	NA
842	Female	Classic	CTT	3.8522	15	21	0.41	NA
850	Female	Classic	R133C	7.54	18	20	0.49	NA
852	Female	Variant	earlytrunc	20.6051	41	36	0.98	NA
868	Female	Classic	LargeDel	17.8207	30	27	0.58	NA
873	Female	Classic	R168X	2.0917	25	30	0.66	NA
894	Female	Classic	CTT	5.1362	26	28	0.82	NA
901	Female	Classic	LargeDel	20.9172	34	29	0.72	NA
915	Female	Other Non-Rett	CTT	4.6543	10	15	0.15	NA
918	Female	Classic	LargeDel	12.4517	9	11	0.01	NA
919	Female	Classic	R270X	21.2621	22	22	0.18	NA
935	Female	Classic	R270X	2.7159	19	23	0.22	NA
941	Female	Classic	R168X	3.2307	13	20	0.1	88
949	Female	Variant	R133C	4.5558	19	23	0.7	NA
951	Female	Classic	R168X	12.9993	22	22	0.16	NA
959	Female	Classic	earlytrunc	8.6188	24	27	0.49	NA
974	Female	Classic	LargeDel	14.4285	22	22	0.32	NA
979	Female	Classic	R133C	11.332	14	10	0.01	NA
985	Female	Classic	earlytrunc	6.8063	36	34	0.92	NA
1002	Female	Classic	R255X	12.1807	33	32	0.7	32
1008	Female	Classic	LargeDel	2.3135	25	29	0.72	NA
1010	Female	Variant	R270X	11.0801	30	31	0.61	NA
1011	Female	Classic	R270X	9.6153	33	36	0.9	NA
1027	Female	Classic	R306C	8.9528	35	34	0.98	NA
1038	Female	Classic	R106W	5.7276	21	24	0.34	NA
1041	Female	Classic	earlytrunc	6.2724	14	15	0.04	NA
1052	Female	Variant	R294X	8.293	7	4	0	46
1070	Female	Classic	R133C	3.4552	20	22	0.64	NA
1071	Female	Classic	R106W	3.3648	23	19	0.06	82
1104	Female	Classic	R306C	3.9863	15	24	0.76	NA
1105	Female	Classic	R255X	1.6427	18	24	0.23	84
1108	Female	Classic	R168X	3.2389	22	26	0.36	NA
1116	Female	Classic	R133C	17.0623	22	20	0.49	NA
1127	Female	Classic	R294X	16.9856	17	18	0.32	NA
1128	Female	Classic	earlytrunc	11.7125	34	33	0.89	NA
1131	Female	Classic	R106W	8.6954	33	34	0.91	NA
1137	Female	Other MECP2 mutation-positive Non-Rett (including normal phenotype)	CTT	7.0609	2	5	0	NA
1141	Female	Classic	T158M	4.5613	22	25	0.5	83
1146	Female	Classic	LargeDel	8.7474	25	28	0.64	NA
1163	Female	Classic	CTT	2.872	14	17	0.23	NA
1175	Female	Classic	R270X	3.3648	16	17	0.06	NA
1177	Female	Classic	CTT	6.8501	20	22	0.47	NA
1183	Female	Classic	T158M	14.8036	18	16	0.08	85
1194	Female	Classic	CTT	6.36	23	26	0.76	NA
1197	Female	Classic	T158M	4.5585	22	24	0.48	NA
1203	Female	Classic	R133C	19.3922	19	16	0.23	NA
1219	Female	Atypical/variant unspecified Rett syndrome	R294X	14.36	15	14	0.11	NA
1220	Female	Classic	R294X	3.6824	21	22	0.63	NA
1235	Female	Atypical/variant unspecified Rett syndrome	CTT	6.9596	14	17	0.23	NA
1259	Female	Classic	T158M	4.0246	18	22	0.33	78
1273	Female	Classic	T158M	8.3669	19	17	0.14	NA
1309	Female	Classic	R270X	3.4908	13	17	0.06	NA
1314	Female	Classic	R294X	23.1869	12	14	0.11	NA
1328	Female	Classic	R255X	7.499	23	25	0.32	NA
1353	Female	Classic	R306C	21.2567	27	25	0.86	NA
1379	Female	Classic	R133C	22.4531	32	28	0.89	NA
1395	Female	Classic	R106W	2.3162	21	34	0.91	NA
1415	Female	Classic	R306C	5.1773	14	17	0.35	NA
1422	Female	Classic	R270X	2.5982	19	23	0.22	NA
1431	Female	Classic	earlytrunc	2.6174	28	29	0.63	NA
1442	Female	Classic	earlytrunc	15.5346	33	29	0.63	NA
1459	Female	Classic	R306C	10.7159	27	28	0.96	69
1460	Female	Classic	R255X	2.2204	22	30	0.61	86
1471	Female	Classic	R106W	4.8323	20	27	0.63	NA
1477	Female	Classic	R168X	4.2574	27	28	0.55	73
1484	Female	Classic	CTT	2.7789	16	23	0.54	NA
1499	Female	Classic	earlytrunc	2.2943	18	22	0.25	NA
1500	Female	Classic	R306C	22.5873	28	25	0.86	NA
1503	Female	Classic	R306C	15.0637	31	24	0.76	NA
1504	Female	Atypical/variant unspecified Rett syndrome	R133C	2.3573	10	18	0.37	NA
1538	Female	Classic	earlytrunc	2.245	21	28	0.55	30
1543	Female	Classic	T158M	18.8227	26	23	0.4	86
1570	Female	Classic	R306C	4.0274	19	25	0.86	NA
1576	Female	Classic	R168X	2.6448	17	30	0.66	85
1582	Female	Other Non-Rett	R294X	17.7577	3	6	0	NA
1594	Female	Classic	R255X	2.2642	27	32	0.7	NA
1598	Female	Classic	R294X	9.6674	19	20	0.54	NA
1615	Female	Classic	CTT	3.5838	18	24	0.63	63
1618	Female	Classic	CTT	7.3265	12	14	0.1	NA
1622	Female	Classic	R255X	3.488	14	17	0.07	NA
1632	Female	Other MECP2 mutation-positive Non-Rett (including normal phenotype)	R294X	15.5483	9	9	0	NA
1636	Female	Classic	T158M	12.961	21	21	0.27	NA
1644	Female	Classic	CTT	7.8713	26	29	0.85	NA
1653	Female	Classic	R133C	3.1513	8	14	0.13	NA
1663	Female	Other MECP2 mutation-positive Non-Rett (including normal phenotype)	earlytrunc	2.6995	6	10	0	NA
1668	Female	Classic	T158M	15.6632	32	32	0.88	NA
1669	Female	Classic	R270X	13.0595	38	36	0.9	NA
1670	Female	Classic	T158M	2.7871	24	27	0.62	NA
1677	Female	Classic	T158M	3.7426	16	21	0.27	NA
1692	Female	Classic	R270X	2.1081	17	22	0.18	88
1694	Female	Other Non-Rett	R306C	23.0828	8	8	0	NA
1712	Female	Classic	R168X	17.807	13	13	0.02	NA
1721	Female	Classic	T158M	24.7118	35	30	0.83	NA
1726	Female	Classic	LargeDel	5.5387	15	20	0.25	NA
1732	Female	Classic	R270X	6.2067	25	28	0.43	NA
1738	Female	Classic	R255X	9.3963	28	26	0.41	NA
1739	Female	Classic	R106W	6.987	29	27	0.63	NA
1741	Female	Other Non-Rett	R106W	4.9363	7	9	0	NA
1750	Female	Classic	LargeDel	7.2964	37	39	0.99	NA
1754	Female	Classic	T158M	2.5106	25	37	0.99	NA
1761	Female	Classic	R255X	2.4394	26	34	0.85	NA
1765	Female	Classic	R270X	2.7652	19	25	0.31	NA
1766	Female	Classic	R270X	5.6893	26	28	0.43	NA
1767	Female	Classic	R306C	8.0438	21	25	0.86	NA
1771	Female	Classic	R168X	2.5133	24	26	0.36	NA
1777	Female	Classic	R255X	4.5311	33	38	0.95	NA
1783	Female	Classic	earlytrunc	18.4559	35	33	0.89	NA
1784	Female	Classic	R255X	2.2012	34	33	0.75	NA
1805	Female	Classic	R133C	6.7488	13	15	0.17	34
1818	Female	Variant	T158M	4.0219	23	25	0.5	NA
1823	Female	Classic	R133C	6.2861	13	19	0.43	NA
1827	Female	Classic	R294X	5.3169	11	13	0.05	80
1831	Female	Classic	R106W	5.5469	21	24	0.34	NA
1836	Female	Classic	R168X	9.2293	34	34	0.86	NA
1846	Female	Classic	earlytrunc	2.0643	22	28	0.55	47
1855	Female	Classic	R168X	3.4086	28	26	0.36	NA
1888	Female	Classic	R255X	1.8919	32	41	0.99	NA
1889	Female	Classic	CTT	16.0301	23	21	0.41	NA
1896	Female	Classic	earlytrunc	4.6899	22	25	0.44	NA
1917	Female	Classic	T158M	9.4757	29	29	0.76	NA
1938	Female	Classic	R133C	5.2074	14	18	0.37	NA
1944	Female	Classic	LargeDel	5.3717	16	18	0.16	NA
1966	Female	Classic	LargeDel	5.399	25	26	0.53	NA
1991	Female	Classic	R306C	18.6119	17	15	0.18	NA
1997	Female	Classic	earlytrunc	2.7242	17	15	0.04	NA
2010	Female	Classic	R255X	18.7871	35	33	0.75	88
2011	Female	Classic	R255X	2.2943	13	18	0.07	92
2018	Female	Other Non-Rett	CTT	9.6838	1	2	0	NA
2025	Female	Classic	CTT	10.9268	15	15	0.15	NA
2035	Female	Classic	LargeDel	15.2088	17	17	0.13	NA
2036	Female	Classic	earlytrunc	3.0171	24	26	0.45	NA
2042	Female	Classic	R168X	22.3737	34	31	0.68	NA
2069	Female	Classic	R133C	3.9151	20	24	0.77	NA
2073	Female	Classic	CTT	24.1177	13	11	0.03	NA
2074	Female	Classic	LargeDel	5.1006	17	19	0.22	91
2083	Female	Classic	R294X	10.872	15	17	0.22	NA
2091	Female	Classic	R133C	10.2122	16	18	0.37	NA
2092	Female	Classic	T158M	5.0623	26	30	0.83	NA
2110	Female	Classic	LargeDel	10.6804	30	31	0.77	NA
2117	Female	Classic	T158M	3.2827	17	20	0.23	72
2141	Female	Classic	R270X	4.1862	26	28	0.43	58
2149	Female	Classic	CTT	6.0151	14	15	0.15	NA
2158	Female	Classic	R133C	14.1656	18	15	0.17	NA
2170	Female	Variant	R255X	4.4189	28	31	0.66	NA
2176	Female	Classic	R294X	4.0137	20	26	0.78	84
2184	Female	Classic	R168X	2.5489	22	26	0.36	NA
2197	Female	Classic	R306C	5.0267	13	18	0.36	NA
2198	Female	Classic	R168X	19.1129	10	10	0	NA
2202	Female	Classic	R255X	8.9692	23	26	0.41	NA
2215	Female	Classic	R294X	10.9076	34	32	0.97	NA
2219	Female	Variant	T158M	5.1554	20	24	0.48	NA
2220	Female	Atypical Preserved Speech (Zapella) Variant Rett syndrome	R133C	7.4908	6	10	0.01	NA
2222	Female	Classic	earlytrunc	2.8364	23	30	0.72	73
2227	Female	Variant	R168X	3.0664	38	42	1	NA
2261	Female	Classic	T158M	10.976	23	25	0.5	NA
2273	Female	Atypical/variant unspecified Rett syndrome	R270X	4.4216	24	26	0.31	NA
2274	Female	Classic	R306C	4.846	14	14	0.11	NA
2295	Female	Variant	R133C	4.6927	11	15	0.17	NA
2304	Female	Classic	LargeDel	5.6564	34	33	0.83	NA
2305	Female	Classic	LargeDel	15.1978	26	28	0.64	NA
2326	Female	Classic	T158M	2.152	22	31	0.87	NA
2327	Female	Classic	CTT	9.6318	30	32	0.94	70
2355	Female	Classic	R168X	1.9603	22	32	0.71	78
2357	Female	Classic	R294X	4.9802	21	24	0.74	NA
2365	Female	Classic	R133C	4.3066	17	24	0.77	NA
2366	Female	Classic	R168X	3.7262	24	28	0.55	NA
2370	Female	Classic	R270X	1.8261	26	31	0.61	NA
2371	Female	Atypical/variant unspecified Rett syndrome	earlytrunc	2.9185	19	26	0.45	NA
2376	Female	Classic	R306C	3.3676	6	15	0.18	NA
2380	Female	Atypical/variant unspecified Rett syndrome	R255X	3.1786	27	33	0.75	NA
2385	Female	Classic	earlytrunc	6.2642	30	31	0.79	NA
2395	Female	Classic	CTT	8.1095	16	22	0.47	NA
2404	Female	Classic	R306C	10.9706	36	35	1	NA
2405	Female	Atypical Preserved Speech (Zapella) Variant Rett syndrome	CTT	5.807	5	14	0.1	NA
2413	Female	Classic	R306C	3.7372	14	20	0.49	NA
2438	Female	Classic	R168X	9.0349	25	23	0.2	74
2456	Female	Classic	LargeDel	4.7474	28	35	0.94	NA
2462	Female	Classic	R168X	17.4237	29	28	0.55	NA
2468	Female	Classic	earlytrunc	2.7899	16	22	0.25	44
2470	Female	Classic	LargeDel	9.4812	25	26	0.53	NA
2471	Female	Classic	LargeDel	3.2142	20	22	0.32	NA
2495	Female	Classic	T158M	24.1588	16	15	0.06	NA
2507	Female	Classic	LargeDel	1.5852	19	23	0.4	NA
2509	Female	Classic	R255X	16.011	21	20	0.13	NA
2524	Female	Classic	T158M	6.0315	31	30	0.83	NA
2539	Female	Atypical Congenital (Rolando) Variant Rett syndrome	earlytrunc	6.1739	32	32	0.84	NA
2547	Female	Classic	R168X	1.6537	23	32	0.71	83
2549	Female	Classic	R306C	2.6146	19	25	0.86	21
2556	Female	Classic	LargeDel	4.1588	41	40	0.99	NA
2612	Female	Classic	T158M	5.6427	25	26	0.58	NA
2613	Female	Classic	R255X	7.0363	19	20	0.13	NA
2614	Female	Classic	R306C	10.7899	14	12	0.05	NA
2617	Female	Other MECP2 mutation-positive Non-Rett (including normal phenotype)	CTT	4.2847	9	26	0.76	NA
2618	Female	Classic	R270X	3.4606	24	30	0.55	60
2642	Female	Variant	CTT	5.0979	24	27	0.79	NA
2646	Female	Classic	R168X	2.7077	23	36	0.91	NA
2650	Female	Classic	R255X	11.896	27	24	0.23	NA
2655	Female	Variant	earlytrunc	3.8357	26	31	0.79	NA
2656	Female	Classic	R270X	5.5086	32	32	0.7	76
2673	Female	Classic	CTT	8.0055	18	17	0.23	NA
2677	Female	Classic	T158M	3.4606	16	23	0.4	22
2682	Female	Classic	R255X	2.4559	22	34	0.85	NA
2693	Female	Atypical Congenital (Rolando) Variant Rett syndrome	LargeDel	1.7057	28	24	0.46	63
2697	Female	Classic	R133C	2.36	12	20	0.49	NA
2700	Female	Classic	R133C	6.4422	28	30	0.94	NA
2707	Female	Classic	T158M	19.8741	20	16	0.08	NA
2711	Female	Classic	earlytrunc	22.4531	37	34	0.92	NA
2714	Female	Classic	R133C	16.6215	35	30	0.94	NA
2735	Female	Classic	earlytrunc	10.6585	18	21	0.22	NA
2741	Female	Classic	earlytrunc	14.6366	32	30	0.72	NA
2745	Female	Classic	R106W	1.8919	28	33	0.83	NA
2747	Female	Classic	T158M	19.6496	25	22	0.33	NA
2748	Female	Classic	R133C	3.9863	15	18	0.37	NA
2792	Female	Classic	LargeDel	20.6762	35	29	0.72	NA
2812	Female	Classic	R270X	13.3552	36	34	0.84	81
2816	Female	Variant	R270X	6.7488	25	30	0.55	68
2817	Female	Classic	CTT	6.6366	13	15	0.15	NA
2823	Female	Classic	T158M	3.781	21	26	0.58	58
2834	Female	Classic	R133C	9.191	25	24	0.77	NA
2837	Female	Classic	CTT	10.7844	23	23	0.54	NA
2841	Female	Classic	R270X	3.8604	12	13	0	83
2843	Female	Variant	CTT	3.7235	11	16	0.21	NA
2847	Female	Classic	R106W	3.3895	17	21	0.23	NA
2850	Female	Classic	earlytrunc	7.6249	28	29	0.63	NA
2855	Female	Classic	LargeDel	3.2444	13	15	0.06	NA
2871	Female	Classic	R255X	4.2656	26	30	0.61	NA
2875	Female	Atypical Preserved Speech (Zapella) Variant Rett syndrome	CTT	8.9336	15	17	0.23	NA
2877	Female	Classic	CTT	19.2498	21	20	0.36	NA
2883	Female	Atypical Preserved Speech (Zapella) Variant Rett syndrome	CTT	10.7296	6	9	0	NA
2889	Female	Classic	R294X	5.2485	14	19	0.38	NA
2892	Female	Classic	CTT	2.5489	22	24	0.63	NA
2899	Female	Variant	LargeDel	3.1266	32	34	0.87	NA
2915	Female	Classic	earlytrunc	4.0739	30	31	0.79	NA
2920	Female	Atypical Preserved Speech (Zapella) Variant Rett syndrome	CTT	18.8255	5	6	0	NA
2923	Female	Classic	R306C	2.3025	16	24	0.76	55
2929	Female	Classic	LargeDel	19.8193	32	25	0.5	NA
2943	Female	Classic	R294X	23.4031	16	18	0.32	NA
2946	Female	Classic	R306C	2.5982	15	21	0.54	NA
2955	Female	Classic	R168X	6.8419	23	28	0.55	NA
2956	Female	Classic	R168X	6.152	22	23	0.2	NA
2963	Female	Classic	CTT	3.9151	21	25	0.7	84
2985	Female	Classic	R168X	5.2567	26	26	0.36	92
2989	Female	Classic	earlytrunc	5.0212	26	24	0.36	NA
2994	Female	Classic	LargeDel	8.0219	27	26	0.53	66
2996	Female	Classic	R255X	6.1821	25	28	0.5	NA
3011	Female	Classic	R168X	2.7187	20	25	0.3	NA
3012	Female	Classic	R255X	12.6489	11	11	0.01	NA
3013	Female	Classic	T158M	13.5852	37	35	0.96	NA
3018	Female	Atypical/variant unspecified Rett syndrome	T158M	13.5578	8	9	0	NA
3029	Female	Classic	R270X	7.7372	27	34	0.84	NA
3031	Female	Other MECP2 mutation-positive Non-Rett (including normal phenotype)	R306C	3.2115	16	22	0.64	NA
3042	Female	Other MECP2 mutation-positive Non-Rett (including normal phenotype)	LargeDel	11.0472	3	4	0	NA
3064	Female	Classic	LargeDel	3.2772	30	27	0.58	NA
3094	Female	Classic	R168X	15.4716	41	38	0.98	NA
3099	Female	Variant	LargeDel	4.9418	32	33	0.83	NA
3105	Female	Classic	earlytrunc	10.7871	26	26	0.45	NA
3110	Female	Classic	CTT	2.7652	20	28	0.82	NA
3111	Female	Variant	R168X	3.1211	24	29	0.61	NA
3117	Female	Other MECP2 mutation-positive Non-Rett (including normal phenotype)	R133C	7.6359	16	18	0.37	NA
3121	Female	Classic	T158M	16.6434	28	29	0.76	NA
3122	Female	Classic	T158M	23.1129	34	29	0.76	68
3134	Female	Classic	LargeDel	2.7488	15	20	0.25	93
3140	Female	Classic	R306C	2.1766	16	22	0.64	43
3158	Female	Classic	R255X	18.5489	16	16	0.05	NA
3168	Female	Classic	earlytrunc	6.0068	28	29	0.63	NA
3201	Female	Classic	R168X	2.2259	14	21	0.12	NA
3218	Female	Variant	R255X	1.6674	25	25	0.32	NA
3221	Female	Classic	R133C	24.4791	35	28	0.89	NA
3222	Female	Classic	R255X	18.7707	18	19	0.11	59
3265	Female	Classic	earlytrunc	2.6995	29	30	0.72	NA
3286	Female	Classic	LargeDel	20.7365	18	16	0.1	NA
3290	Female	Classic	earlytrunc	20.7091	23	22	0.25	22
3296	Female	Classic	R294X	6.8966	17	19	0.38	NA
3316	Female	Classic	R306C	5.2649	13	11	0.02	NA
3324	Female	Variant	R133C	4.3778	10	13	0.09	NA
3333	Female	Classic	R168X	9.4757	16	20	0.1	NA
3334	Female	Variant	R168X	2.5572	18	24	0.23	NA
3337	Female	Classic	R306C	7.0198	20	23	0.73	85
3344	Female	Classic	CTT	4.7502	14	19	0.31	NA
3356	Female	Classic	earlytrunc	2.4778	25	30	0.72	NA
3368	Female	Classic	R133C	21.4675	20	18	0.37	NA
3374	Female	Classic	R294X	16.553	17	18	0.32	NA
3376	Female	Classic	T158M	3.2197	21	28	0.67	70
3378	Female	Classic	R133C	3.0992	12	20	0.49	NA
3383	Female	Classic	earlytrunc	6.1547	23	24	0.36	NA
3387	Female	Variant	R133C	5.6865	13	17	0.3	NA
3389	Female	Classic	R294X	7.1622	15	16	0.18	NA
3390	Female	Classic	LargeDel	3.5455	18	16	0.1	NA
3394	Female	Classic	CTT	13.629	34	31	0.9	NA
3399	Female	Classic	T158M	6.9021	27	28	0.67	67
3405	Female	Classic	R168X	10.2533	38	37	0.96	NA
3408	Female	Classic	R306C	3.0554	13	21	0.54	NA
3414	Female	Classic	R270X	19.0007	34	32	0.7	NA
3419	Female	Classic	earlytrunc	22.2067	28	25	0.44	NA
3434	Female	Classic	CTT	21.4401	23	19	0.31	NA
3441	Female	Classic	R255X	20.8542	37	32	0.7	NA
3447	Female	Variant	CTT	8.6762	15	17	0.23	NA
3449	Female	Classic	R255X	1.4702	25	28	0.5	NA
3454	Female	Classic	T158M	3.2663	24	26	0.58	84
3461	Female	Classic	R133C	10.1437	22	22	0.64	NA
3463	Female	Classic	CTT	17.7933	30	26	0.76	NA
3470	Female	Classic	CTT	5.5332	16	20	0.36	NA
3473	Female	Classic	T158M	3.2663	30	35	0.96	NA
3481	Female	Classic	R306C	2.5133	12	17	0.35	NA
3494	Female	Classic	R306C	5.3169	19	22	0.64	NA
3505	Female	Classic	R255X	2.2615	20	26	0.41	NA
3522	Female	Classic	R306C	8.7584	20	19	0.39	53
3525	Female	Variant	LargeDel	8.2765	38	35	0.94	NA
3549	Female	Classic	T158M	18.308	33	30	0.83	NA
3556	Female	Classic	LargeDel	14.7652	33	29	0.72	NA
3576	Female	Classic	R306C	2.7324	8	16	0.29	NA
3584	Female	Atypical/variant unspecified Rett syndrome	CTT	8.1588	17	18	0.28	NA
3636	Female	Atypical/variant unspecified Rett syndrome	CTT	10.6913	7	10	0.01	NA
3638	Female	Classic	R168X	19.8768	37	33	0.79	NA
3641	Female	Classic	T158M	3.5017	22	28	0.67	NA
3647	Female	Classic	T158M	5.5578	22	29	0.76	NA
3656	Female	Classic	T158M	24.8159	34	29	0.76	NA
3670	Female	Classic	CTT	7.8877	13	14	0.1	NA
3684	Female	Classic	R255X	2.8118	27	31	0.66	NA
3693	Female	Classic	R168X	1.9849	25	36	0.91	NA
3702	Female	Classic	R306C	4.6653	21	25	0.86	NA
3707	Female	Classic	R306C	20.7693	25	23	0.73	NA
3710	Female	Classic	R294X	3.4387	14	24	0.74	NA
3712	Female	Classic	CTT	22.4832	29	24	0.63	NA
3713	Female	Classic	R133C	5.4346	15	16	0.23	69
3718	Female	Classic	R255X	6.9788	33	39	0.98	NA
3721	Female	Classic	T158M	2.5462	12	19	0.18	NA
3742	Female	Classic	R255X	2.4613	22	35	0.89	NA
3754	Female	Atypical Preserved Speech (Zapella) Variant Rett syndrome	CTT	3.5318	14	16	0.21	NA
3774	Female	Atypical Delayed Onset Variant Rett syndrome	CTT	18.6064	11	11	0.03	NA
3782	Female	Classic	R168X	7.4689	43	42	1	NA
3789	Female	Classic	R133C	3.4141	14	21	0.57	NA
3797	Female	Classic	LargeDel	10.2861	22	24	0.46	86
3857	Female	Classic	R306C	6.6995	16	16	0.29	37
3859	Female	Classic	R168X	7.5455	26	34	0.86	NA
3861	Female	Classic	R133C	2.809	9	10	0.01	59
3864	Female	Classic	R168X	6.6311	15	19	0.07	87
3865	Female	Classic	R294X	17.7248	15	17	0.22	NA
3871	Female	Other MECP2 mutation-positive Non-Rett (including normal phenotype)	CTT	13.1225	16	11	0.03	78
3878	Female	Classic	T158M	3.0773	26	27	0.62	19
3887	Female	Classic	CTT	8.6543	30	29	0.85	NA
3889	Female	Classic	R255X	2.3053	29	34	0.85	77
3895	Female	Classic	R306C	5.6044	16	19	0.39	NA
3899	Female	Atypical Congenital (Rolando) Variant Rett syndrome	LargeDel	3.5017	26	31	0.77	NA
3903	Female	Variant	earlytrunc	2.2697	18	20	0.16	NA
3906	Female	Classic	T158M	15.0801	34	34	0.92	66
3912	Female	Classic	R294X	8.2847	11	12	0.03	NA
3917	Female	Classic	R168X	1.8754	25	24	0.23	NA
3921	Female	Classic	LargeDel	5.1006	20	23	0.4	NA
3922	Female	Classic	CTT	6.475	6	10	0.01	NA
3931	Female	Classic	R255X	16.9172	45	38	0.95	NA
3934	Female	Classic	R133C	5.3333	18	22	0.64	NA
3947	Female	Classic	R255X	1.8453	18	26	0.41	NA
3963	Female	Classic	R270X	17.1417	39	35	0.88	NA
3968	Female	Other Non-Rett	T158M	14.9979	2	4	0	NA
3978	Female	Classic	T158M	14.6749	29	27	0.62	NA
3979	Female	Classic	R255X	21.8398	40	36	0.93	NA
3990	Female	Classic	T158M	15.718	37	33	0.9	NA
3992	Female	Classic	R168X	3.6961	34	35	0.9	86
3993	Female	Classic	LargeDel	21.3799	33	26	0.53	100
4003	Female	Classic	earlytrunc	11.7262	40	35	0.96	NA
4006	Female	Classic	R168X	12.7858	27	27	0.45	NA
4017	Female	Classic	R294X	10.1465	22	20	0.54	NA
4027	Female	Classic	R294X	13.0897	16	13	0.05	54
4033	Female	Classic	earlytrunc	9.5277	17	17	0.1	NA
4039	Female	Classic	T158M	3.8001	31	34	0.92	58
4040	Female	Classic	R306C	3.4387	14	14	0.11	93
4046	Female	Classic	R270X	16.6708	31	29	0.54	NA
4050	Female	Classic	LargeDel	10.82	15	20	0.25	85
4060	Female	Classic	earlytrunc	15.7344	32	31	0.79	88
4063	Female	Classic	R168X	17.0103	31	27	0.45	NA
4067	Female	Classic	earlytrunc	3.384	21	22	0.25	NA
4072	Female	Classic	R306C	16.627	24	21	0.54	76
4076	Female	Classic	R270X	9.8207	33	30	0.55	NA
4086	Female	Classic	R306C	10.3326	11	11	0.02	NA
4091	Female	Classic	R294X	13.2621	14	15	0.14	NA
4092	Female	Classic	CTT	5.2211	24	21	0.41	NA
4105	Female	Classic	T158M	18.2067	17	15	0.06	NA
4108	Female	Classic	R255X	13.3443	26	22	0.16	NA
4118	Female	Classic	T158M	3.7563	27	29	0.76	NA
4150	Female	Classic	earlytrunc	5.8836	9	13	0.02	NA
4162	Female	Classic	LargeDel	19.6468	38	33	0.83	NA
4169	Female	Classic	CTT	17.64	23	19	0.31	NA
4184	Female	Classic	R168X	10.8364	23	24	0.23	80
4199	Female	Classic	R306C	2.3792	18	26	0.93	NA
4212	Female	Other Non-Rett	R306C	3.0418	8	13	0.09	NA
4222	Female	Classic	R306C	3.7481	23	25	0.86	NA
4223	Female	Classic	R270X	3.3703	32	36	0.9	NA
4224	Female	Classic	CTT	20.0849	27	23	0.54	NA
4226	Female	Classic	earlytrunc	8.9199	32	32	0.84	NA
4247	Female	Atypical/variant unspecified Rett syndrome	R255X	2.7652	29	36	0.93	NA
4248	Female	Classic	R106W	1.8919	23	33	0.83	NA
4260	Female	Variant	R168X	4.9309	27	34	0.86	NA
4264	Female	Other MECP2 mutation-positive Non-Rett (including normal phenotype)	CTT	6.3847	6	6	0	61
4267	Female	Other MECP2 mutation-positive Non-Rett (including normal phenotype)	R306C	2.245	16	25	0.86	NA
4280	Female	Other MECP2 mutation-positive Non-Rett (including normal phenotype)	CTT	2.1821	24	33	0.96	NA
4299	Female	Classic	R294X	2.7625	16	29	0.94	NA
4307	Female	Classic	R306C	6.2669	22	24	0.76	NA
4308	Female	Classic	earlytrunc	1.9028	24	33	0.89	NA
4325	Female	Classic	R294X	5.1417	18	24	0.74	NA
4327	Female	Classic	T158M	2.412	14	22	0.33	NA
4330	Female	Classic	T158M	22.6311	26	21	0.27	NA
4331	Female	Classic	R270X	2.0041	16	29	0.54	82
4333	Female	Classic	R255X	10.9733	17	19	0.11	63
4345	Female	Classic	CTT	7.447	26	25	0.7	NA
4351	Female	Classic	R106W	3.7454	24	30	0.69	76
4361	Female	Classic	earlytrunc	3.0253	20	23	0.3	13
4365	Female	Classic	R270X	3.3895	25	32	0.7	NA
4375	Female	Atypical Preserved Speech (Zapella) Variant Rett syndrome	R306C	10.5435	10	12	0.05	88
4379	Female	Classic	earlytrunc	4.5366	28	27	0.49	51
4384	Female	Classic	earlytrunc	4.4463	24	25	0.44	NA
4389	Female	Classic	T158M	6.4175	30	29	0.76	31
4425	Female	Classic	R255X	4.4162	20	21	0.14	NA
4427	Female	Classic	R255X	5.7057	22	23	0.18	NA
4441	Female	Classic	R255X	2.5024	20	25	0.32	NA
4457	Female	Classic	R306C	3.5346	10	14	0.11	NA
4478	Female	Classic	T158M	20.5667	30	27	0.62	70
4481	Female	Atypical/variant unspecified Rett syndrome	R133C	4.1314	9	14	0.13	NA
4496	Female	Classic	LargeDel	14.193	30	28	0.64	NA
4497	Female	Classic	T158M	4.4025	16	16	0.08	NA
4499	Female	Atypical/variant unspecified Rett syndrome	R133C	8.1643	9	11	0.04	NA
4501	Female	Classic	T158M	6.037	22	25	0.5	NA
4534	Female	Classic	R168X	2.4285	30	25	0.3	NA
4550	Female	Classic	R255X	8.0876	20	24	0.23	70
4561	Female	Classic	earlytrunc	3.4031	14	16	0.07	NA
4575	Female	Classic	R294X	9.3717	19	20	0.54	NA
4579	Female	Classic	T158M	4.4654	28	27	0.62	NA
4590	Female	Classic	R168X	20.8159	23	22	0.16	NA
4598	Female	Classic	R168X	18.9076	17	17	0.04	NA
4605	Female	Classic	CTT	22.7351	28	23	0.54	88
4613	Female	Classic	CTT	6.1629	13	16	0.21	NA
4614	Female	Classic	LargeDel	3.0664	25	26	0.53	NA
4618	Female	Classic	T158M	4.9254	22	21	0.27	90
4634	Female	Variant	LargeDel	12.8515	34	32	0.79	NA
4642	Female	Classic	R168X	2.193	34	34	0.86	NA
4648	Female	Classic	R306C	17.7057	15	13	0.09	NA
4654	Female	Other Non-Rett	CTT	7.5619	3	6	0	NA
4667	Female	Classic	R106W	16.1615	29	26	0.46	NA
4680	Female	Variant	R106W	5.7276	14	17	0	NA
4687	Female	Variant	R306C	4.9062	9	12	0.05	NA
4691	Female	Classic	R168X	2.1355	14	20	0.1	NA
4692	Female	Classic	R133C	5.3662	10	15	0.17	NA
4718	Female	Classic	R306C	5.2485	12	20	0.49	NA
4731	Female	Classic	T158M	12.4791	22	23	0.4	NA
4732	Female	Classic	CTT	3.1759	25	32	0.94	NA
4741	Female	Classic	R294X	19.4962	15	16	0.18	NA
4746	Female	Classic	R168X	9.8535	39	38	0.98	NA
4748	Female	Classic	earlytrunc	8.1561	19	23	0.3	NA
4761	Female	Classic	R106W	2.935	31	35	0.97	NA
4763	Female	Classic	earlytrunc	2.0835	23	25	0.44	54
4764	Female	Classic	R168X	3.0062	24	27	0.45	NA
4768	Female	Classic	R106W	5.629	13	21	0.23	NA
4771	Female	Classic	R106W	2.2259	19	20	0.14	52
4775	Female	Classic	LargeDel	2.6995	29	33	0.83	NA
4785	Female	Classic	LargeDel	3.9151	11	13	0.04	NA
4790	Female	Classic	R255X	5.3196	28	31	0.66	NA
4794	Female	Classic	T158M	5.5168	22	22	0.33	NA
4804	Female	Classic	R255X	3.2526	22	25	0.32	NA
4818	Female	Classic	R255X	10.1191	20	24	0.23	NA
4821	Female	Variant	R294X	8.0301	12	15	0.14	NA
4822	Female	Classic	R306C	2.8528	18	22	0.64	NA
4832	Female	Classic	T158M	2.8309	13	14	0.04	NA
4842	Female	Classic	R168X	24.9008	35	31	0.68	NA
4855	Female	Classic	R168X	4.3149	24	26	0.36	NA
4859	Female	Classic	R133C	3.05	10	16	0.23	NA
4860	Female	Other MECP2 mutation-positive Non-Rett (including normal phenotype)	R270X	2.2122	18	25	0.31	NA
4872	Female	Classic	R270X	12.0931	20	22	0.18	NA
4878	Female	Classic	R168X	7.885	33	33	0.79	NA
4883	Female	Classic	R270X	3.8768	15	18	0.09	43
4884	Female	Classic	earlytrunc	4.3203	13	20	0.16	NA
4891	Female	Classic	R255X	4.9692	10	15	0.05	NA
4895	Female	Classic	T158M	13.514	21	21	0.27	NA
4914	Female	Variant	R168X	5.5305	29	31	0.68	NA
4919	Female	Classic	R255X	2.7296	24	31	0.66	NA
4921	Female	Classic	R168X	10.59	35	34	0.86	88
4924	Female	Classic	R270X	3.718	14	18	0.09	NA
4927	Female	Classic	CTT	5.3744	24	29	0.85	NA
4942	Female	Classic	R168X	5.9274	12	19	0.07	NA
4958	Female	Classic	R294X	14.2642	23	21	0.6	60
4966	Female	Classic	R255X	2.3491	23	25	0.32	100
4996	Female	Variant	R133C	8.4189	14	16	0.23	NA
5014	Female	Classic	R133C	2.371	22	24	0.77	76
5042	Female	Classic	T158M	11.3977	26	26	0.58	NA
5049	Female	Classic	CTT	17.6783	19	16	0.21	NA
5051	Female	Classic	T158M	2.8994	18	27	0.62	70
5053	Female	Variant	R255X	3.4634	28	37	0.95	NA
5062	Female	Classic	T158M	5.5633	19	21	0.27	NA
5064	Female	Classic	R168X	24.8761	30	27	0.45	NA
5065	Female	Classic	CTT	5.8973	13	17	0.23	NA
5066	Female	Classic	R270X	5.3854	26	26	0.31	NA
5074	Female	Classic	earlytrunc	2.59	15	22	0.25	NA
5077	Female	Classic	R255X	12.8433	38	36	0.93	NA
5080	Female	Classic	T158M	13.8672	28	25	0.5	NA
5081	Female	Classic	earlytrunc	1.9247	14	19	0.14	NA
5091	Female	Classic	R294X	10.1821	16	14	0.11	NA
5092	Female	Classic	R168X	6.1547	25	27	0.45	NA
5101	Female	Variant	CTT	7.2471	5	9	0	NA
5102	Female	Classic	CTT	22.9569	30	22	0.47	NA
5111	Female	Classic	R168X	21.744	35	32	0.71	NA
5113	Female	Classic	CTT	5.9576	24	26	0.76	NA
5144	Female	Classic	R270X	4.2902	22	29	0.54	NA
5156	Female	Classic	R106W	5.6044	31	32	0.74	72
5173	Female	Classic	R270X	16.1369	41	38	0.97	NA
5177	Female	Atypical/variant unspecified Rett syndrome	CTT	11.1129	16	15	0.15	46
5179	Female	Classic	T158M	10.7817	13	13	0.03	NA
5191	Female	Variant	R294X	14.3463	31	24	0.74	NA
5205	Female	Classic	CTT	3.6797	7	16	0.21	NA
5208	Female	Classic	R168X	1.8453	21	26	0.36	NA
5221	Female	Classic	T158M	14.3326	26	23	0.4	77
5223	Female	Classic	LargeDel	23.0938	13	11	0.01	NA
5225	Female	Classic	LargeDel	21.4648	39	32	0.79	NA
5227	Female	Classic	R294X	20.8871	25	24	0.74	NA
5233	Female	Atypical Preserved Speech (Zapella) Variant Rett syndrome	R106W	6.3546	11	11	0	93
5238	Female	Classic	R106W	2.078	23	26	0.46	NA
5239	Female	Classic	CTT	15.6687	22	20	0.36	NA
5241	Female	Classic	R306C	6.1766	12	14	0.11	NA
5245	Female	Classic	CTT	4.3833	20	21	0.41	NA
5246	Female	Classic	R255X	9.2786	16	18	0.07	NA
5278	Female	Classic	R306C	6.601	17	16	0.29	NA
5294	Female	Classic	R294X	6.3847	25	27	0.85	NA
5302	Female	Classic	R294X	10.3819	19	20	0.54	NA
5305	Female	Classic	LargeDel	4.5613	19	21	0.26	NA
5307	Female	Classic	R294X	9.7303	10	12	0.03	36
5318	Female	Atypical/variant unspecified Rett syndrome	R294X	3.4798	9	19	0.38	15
5319	Female	Classic	R168X	3.1376	32	34	0.86	NA
5332	Female	Classic	R133C	2.7379	15	20	0.49	NA
5344	Female	Classic	T158M	10.0643	27	28	0.67	NA
5356	Female	Classic	R133C	17.848	27	22	0.64	NA
5362	Female	Classic	R255X	3.6988	17	24	0.23	NA
5364	Female	Classic	R133C	10.2943	17	18	0.37	NA
5375	Female	Classic	T158M	4.3176	15	19	0.18	NA
5378	Female	Classic	CTT	14.9624	24	21	0.41	35
5387	Female	Classic	CTT	2.4723	20	23	0.54	NA
5390	Female	Classic	R294X	17.6372	17	15	0.14	94
5397	Female	Classic	CTT	7.9261	16	16	0.21	NA
5427	Female	Classic	LargeDel	4.115	14	19	0.22	NA
5434	Female	Variant	R255X	3.4908	26	32	0.7	NA
5443	Female	Classic	R306C	3.1294	12	15	0.18	NA
5446	Female	Classic	R270X	13.5633	27	26	0.31	NA
5450	Female	Variant	R306C	5.8097	7	8	0	NA
5455	Female	Classic	R306C	5.2923	16	20	0.49	NA
5467	Female	Classic	T158M	2.9678	19	22	0.33	56
5476	Female	Classic	R255X	2.8994	28	25	0.32	NA
5491	Female	Classic	R255X	3.9261	28	28	0.5	NA
5511	Female	Classic	T158M	3.8111	19	23	0.4	NA
5518	Female	Classic	R106W	4.4381	18	21	0.23	NA
5519	Female	Classic	CTT	5.5195	16	18	0.28	79
5528	Female	Classic	earlytrunc	5.1773	35	38	0.98	NA
5534	Female	Variant	R106W	2.5517	20	22	0.26	NA
5540	Female	Classic	CTT	3.1266	15	20	0.36	82
5541	Female	Classic	CTT	14.0862	21	23	0.54	NA
5543	Female	Classic	R168X	7.1157	21	21	0.12	NA
5545	Female	Classic	CTT	5.3169	12	18	0.28	NA
5552	Female	Classic	R168X	24.5175	31	28	0.55	NA
5558	Female	Classic	LargeDel	9.8152	41	37	0.96	NA
5589	Female	Classic	T158M	8.5722	32	28	0.67	NA
5608	Female	Classic	R168X	23.4771	31	27	0.45	NA
5626	Female	Classic	T158M	17.7248	26	22	0.33	NA
5634	Female	Classic	R106W	2.5763	21	27	0.63	NA
5666	Female	Variant	R168X	2.6283	28	33	0.79	NA
5685	Female	Classic	CTT	19.0363	13	11	0.03	NA
5705	Female	Classic	CTT	8.5284	15	14	0.1	NA
5719	Female	Classic	R306C	6.1246	11	12	0.05	NA
5739	Female	Variant	CTT	4.0438	10	12	0.04	NA
5750	Female	Classic	R168X	2.5845	21	27	0.45	NA
5755	Female	Classic	CTT	5.3169	10	14	0.1	NA
5764	Female	Classic	R270X	3.3457	31	34	0.84	NA
5782	Female	Classic	LargeDel	6.1218	16	19	0.22	NA
5783	Female	Classic	CTT	5.2704	16	18	0.28	NA
5785	Female	Classic	CTT	12.7995	12	13	0.07	NA
5786	Female	Classic	R255X	14.7132	22	24	0.23	NA
5800	Female	Classic	T158M	15.8905	31	30	0.83	NA
5812	Female	Classic	R255X	13.6537	13	13	0.03	NA
5842	Female	Classic	T158M	13.1116	31	27	0.62	NA
5865	Female	Classic	earlytrunc	9.796	19	21	0.22	NA
5870	Female	Classic	R294X	11.5975	20	20	0.54	69
5886	Female	Classic	LargeDel	19.0691	40	34	0.87	NA
5892	Female	Classic	earlytrunc	4.3258	28	36	0.98	NA
5893	Female	Classic	R168X	2.7379	15	16	0.03	86
5913	Female	Classic	LargeDel	3.4552	36	34	0.87	NA
5937	Female	Classic	R270X	9.0075	24	23	0.22	NA
5939	Female	Atypical Congenital (Rolando) Variant Rett syndrome	earlytrunc	13.7139	14	13	0.02	NA
5940	Female	Classic	R168X	2.4997	23	29	0.61	NA
5954	Female	Classic	R294X	4.9665	20	20	0.54	44
5965	Female	Classic	R255X	4.4956	27	25	0.32	NA
5976	Female	Classic	CTT	4.909	28	27	0.79	NA
5979	Female	Classic	R255X	10.5818	28	30	0.61	NA
5985	Female	Classic	T158M	7.2279	14	17	0.14	NA
6007	Female	Atypical/variant unspecified Rett syndrome	R255X	10.4586	28	32	0.7	NA
6011	Female	Classic	R133C	2.0862	15	23	0.7	NA
6015	Female	Classic	R168X	1.5715	20	27	0.45	NA
6026	Female	Variant	R270X	2.5106	20	29	0.54	NA
6027	Female	Classic	R255X	2.4832	23	36	0.93	65
6034	Female	Other MECP2 mutation-positive Non-Rett (including normal phenotype)	CTT	8.6461	1	4	0	NA
6037	Female	Variant	R255X	5.5003	33	25	0.32	NA
6041	Female	Classic	LargeDel	2.7844	15	19	0.22	NA
6044	Female	Classic	R168X	24.0684	31	28	0.55	NA
6047	Female	Classic	CTT	3.4771	22	32	0.94	63
6051	Female	Classic	LargeDel	1.9384	17	34	0.87	68
6053	Female	Classic	CTT	3.5099	11	24	0.63	NA
6066	Female	Other Non-Rett	R133C	0.7064	9	9	0.01	NA
6072	Female	Variant	R133C	11.8138	6	6	0	NA
6078	Female	Atypical/variant unspecified Rett syndrome	R168X	4.8706	26	29	0.61	NA
6091	Female	Classic	earlytrunc	1.3552	27	32	0.84	NA
6110	Female	Classic	earlytrunc	14.3107	25	25	0.44	NA
6134	Female	Classic	R306C	8.0548	27	29	0.96	NA
6137	Female	Classic	R168X	6.3792	11	12	0.02	NA
6139	Female	Classic	R106W	4.6571	28	35	0.97	NA
6141	Female	Classic	R294X	5.5825	13	14	0.11	NA
6150	Female	Classic	R255X	12.0794	36	36	0.93	NA
6154	Female	Variant	CTT	11.091	8	9	0	NA
6167	Female	Classic	CTT	5.6893	8	13	0.07	NA
6168	Female	Classic	CTT	6.6749	7	13	0.07	37
6178	Female	Classic	T158M	2.5161	26	35	0.96	NA
6196	Female	Classic	LargeDel	11.102	15	17	0.13	NA
6222	Female	Classic	earlytrunc	5.1718	20	23	0.3	61
6232	Female	Classic	R133C	2.3929	16	25	0.84	NA
6233	Female	Classic	R306C	4.9528	18	20	0.49	NA
6243	Female	Classic	R255X	8.616	33	33	0.75	NA
6246	Female	Classic	CTT	2.8693	8	15	0.15	68
6260	Female	Classic	earlytrunc	3.9343	27	30	0.72	NA
6261	Female	Classic	CTT	5.4319	27	27	0.79	87
6264	Female	Classic	R255X	5.4045	17	21	0.14	NA
6265	Female	Classic	R270X	4.6735	29	31	0.61	NA
6280	Female	Classic	LargeDel	8.8241	14	17	0.13	NA
6289	Female	Classic	LargeDel	2.6092	22	22	0.32	NA
6293	Female	Classic	R168X	2.2341	18	19	0.07	NA
6297	Female	Classic	R306C	10.6694	26	23	0.73	76
6305	Female	Classic	CTT	19.6988	40	33	0.96	NA
6307	Female	Classic	R168X	2.0096	19	27	0.45	NA
6318	Female	Classic	earlytrunc	3.8741	25	28	0.55	NA
6319	Female	Classic	CTT	13.5661	27	20	0.36	NA
6322	Female	Classic	R168X	3.2608	29	37	0.96	NA
6326	Female	Classic	earlytrunc	8.46	16	15	0.04	NA
6337	Female	Classic	R168X	5.9247	26	27	0.45	80
6339	Female	Classic	R106W	5.3142	16	18	0.03	NA
6342	Female	Classic	R168X	3.8549	10	18	0.05	NA
6346	Female	Classic	LargeDel	2.2834	28	31	0.77	NA
6349	Female	Classic	R255X	10.2505	31	29	0.56	NA
6356	Female	Classic	R306C	4.4545	17	21	0.54	39
6364	Female	Classic	R294X	17.1143	28	26	0.78	NA
6369	Female	Classic	R168X	1.9959	26	31	0.68	NA
6379	Female	Atypical/variant unspecified Rett syndrome	LargeDel	11.0472	7	9	0	NA
6401	Female	Classic	CTT	10.3272	10	11	0.03	NA
6402	Female	Classic	T158M	10.2177	24	22	0.33	NA
6407	Female	Classic	R306C	10.8337	22	22	0.64	NA
6410	Female	Classic	R294X	7.9097	14	17	0.22	NA
6420	Female	Classic	R294X	4.2519	14	19	0.38	NA
6421	Female	Other Non-Rett	LargeDel	5.1444	1	4	0	NA
6432	Female	Classic	earlytrunc	7.2142	25	24	0.36	NA
6457	Female	Classic	R133C	8.7912	20	22	0.64	NA
6460	Female	Classic	R168X	2.935	22	34	0.86	NA
6470	Female	Classic	earlytrunc	2.4887	23	30	0.72	33
6474	Female	Classic	T158M	2.5133	20	24	0.48	66
6478	Female	Classic	R270X	9.9849	40	40	0.99	NA
6479	Female	Classic	T158M	4.1752	32	36	0.98	NA
6482	Female	Classic	R133C	4.0767	15	20	0.49	NA
6483	Female	Classic	LargeDel	13.1636	23	22	0.32	NA
6486	Female	Atypical/variant unspecified Rett syndrome	R133C	4.4326	6	9	0.01	NA
6492	Female	Classic	CTT	19.9535	16	12	0.04	NA
6494	Female	Classic	R270X	8.1506	33	34	0.84	NA
6508	Female	Classic	T158M	9.5414	24	32	0.88	NA
6509	Female	Classic	R270X	16.167	42	39	0.99	NA
6513	Female	Classic	CTT	2.7379	16	22	0.47	58
6531	Female	Classic	R133C	4.2136	18	25	0.84	77
6532	Female	Classic	R255X	4.5969	32	35	0.89	NA
6534	Female	Classic	R255X	13.2019	9	9	0.01	80
6536	Female	Classic	R294X	24.9802	35	32	0.97	NA
6537	Female	Classic	CTT	3.7947	18	22	0.47	NA
6561	Female	Classic	LargeDel	7.5921	34	34	0.87	NA
6565	Female	Atypical Preserved Speech (Zapella) Variant Rett syndrome	CTT	22.653	9	7	0	NA
6582	Female	Classic	R168X	2.8255	24	27	0.45	NA
6591	Female	Variant	R306C	14.8337	8	9	0.01	NA
6601	Female	Classic	R255X	19.258	22	22	0.16	NA
6608	Female	Classic	CTT	4.1068	26	30	0.9	NA
6625	Female	Classic	R133C	9.9685	16	17	0.3	NA
6663	Female	Classic	earlytrunc	13.0842	18	18	0.12	NA
6669	Female	Classic	CTT	16.2628	34	28	0.82	NA
6690	Female	Classic	R306C	6.3929	20	22	0.64	NA
6712	Female	Classic	R168X	3.0773	24	28	0.55	NA
6718	Female	Classic	R306C	6.3984	24	24	0.76	NA
6742	Female	Classic	R168X	14.037	44	41	0.99	NA
6754	Female	Atypical Delayed Onset Variant Rett syndrome	CTT	17.7303	34	27	0.79	NA
6759	Female	Classic	CTT	3.2115	24	30	0.9	NA
6772	Female	Classic	R133C	4.2628	8	15	0.17	NA
6780	Female	Classic	R294X	13.1663	19	19	0.38	NA
6781	Female	Classic	earlytrunc	2.8255	36	34	0.92	NA
6783	Female	Classic	R294X	9.0623	29	29	0.94	81
6787	Female	Classic	R168X	4.4572	29	35	0.9	NA
6802	Female	Classic	R255X	7.7645	19	23	0.18	NA
6815	Female	Classic	R133C	4.7064	14	19	0.43	NA
6816	Female	Classic	R133C	4.6598	11	16	0.23	NA
6819	Female	Classic	R168X	1.9384	26	33	0.79	NA
6841	Female	Other Non-Rett	R133C	3.7728	7	8	0	NA
6860	Female	Classic	R306C	4.5229	10	22	0.64	NA
6863	Female	Classic	R270X	14.3792	25	24	0.28	75
6864	Female	Other Non-Rett	CTT	20.0849	2	3	0	NA
6873	Female	Classic	R168X	2.6393	20	33	0.79	NA
6875	Female	Classic	CTT	1.974	20	25	0.7	77
6903	Female	Classic	R106W	2.6338	18	23	0.29	NA
6913	Female	Classic	R168X	6.8008	22	25	0.3	77
6919	Female	Classic	T158M	3.1978	25	29	0.76	NA
6922	Female	Classic	R168X	5.1143	29	30	0.66	NA
6924	Female	Classic	R306C	18.694	18	17	0.35	NA
6927	Female	Classic	R255X	2.2888	24	35	0.89	NA
6929	Female	Classic	R255X	2.4148	21	27	0.46	81
6945	Female	Classic	R306C	7.7043	16	16	0.29	NA
6951	Female	Classic	R168X	10.2012	26	27	0.45	NA
6957	Female	Classic	R168X	9.5086	35	29	0.61	NA
6966	Female	Classic	earlytrunc	24.4381	19	20	0.16	NA
6968	Female	Classic	R133C	5.5825	20	29	0.94	29
6970	Female	Classic	R270X	2.3409	20	28	0.43	NA
6982	Female	Classic	LargeDel	4.4408	15	16	0.1	NA
6985	Female	Classic	LargeDel	4.5311	14	21	0.26	93
6986	Female	Classic	R255X	11.6851	28	27	0.46	NA
7005	Female	Classic	earlytrunc	9.7467	26	31	0.79	NA
7009	Female	Other MECP2 mutation-positive Non-Rett (including normal phenotype)	CTT	6.9514	9	14	0.1	NA
7029	Female	Classic	R270X	2.3792	28	35	0.88	NA
7061	Female	Classic	R168X	3.0828	18	26	0.36	NA
7070	Female	Classic	LargeDel	4.5448	10	12	0.02	69
7080	Female	Classic	R106W	5.0732	31	33	0.83	NA
7082	Female	Classic	R270X	3.4825	31	31	0.61	NA
7100	Female	Classic	T158M	15.8056	36	32	0.88	NA
7103	Female	Classic	R255X	3.4825	25	32	0.7	NA
7126	Female	Classic	T158M	2.4449	21	28	0.67	NA
7133	Female	Atypical/variant unspecified Rett syndrome	R270X	4.1807	30	34	0.84	NA
7135	Female	Classic	R168X	1.076	18	25	0.3	NA
7140	Female	Classic	R255X	4.5202	12	15	0.05	84
7145	Female	Classic	R168X	7.1622	18	23	0.2	NA
7150	Female	Classic	R133C	7.2799	5	9	0.01	NA
7167	Female	Classic	R270X	1.9548	27	36	0.9	75
7190	Female	Classic	R306C	6.768	25	32	0.98	NA
7221	Female	Classic	earlytrunc	2.13	13	16	0.07	72
7225	Female	Classic	R306C	3.332	16	22	0.64	NA
7257	Female	Classic	earlytrunc	2.4449	14	16	0.07	NA
7258	Female	Classic	R294X	21.1253	22	23	0.66	NA
7262	Female	Classic	T158M	16.7009	18	16	0.08	76
7265	Female	Classic	R255X	3.9589	25	31	0.66	NA
7269	Female	Classic	R255X	3.4825	24	33	0.75	NA
7277	Female	Variant	earlytrunc	19.729	28	29	0.63	NA
7287	Female	Classic	R255X	6.2396	32	34	0.85	NA
7288	Female	Classic	R133C	12.1615	16	14	0.13	NA
7297	Female	Other MECP2 mutation-positive Non-Rett (including normal phenotype)	R133C	2.1054	18	18	0.37	NA
7298	Female	Classic	CTT	3.1184	16	24	0.63	76
7302	Female	Classic	R168X	10.5982	35	34	0.86	NA
7319	Female	Classic	CTT	14.2615	24	23	0.54	NA
7340	Female	Classic	R106W	21.9521	35	31	0.69	NA
7342	Female	Classic	T158M	2.4038	24	29	0.76	NA
7344	Female	Classic	R270X	4.3751	13	17	0.06	NA
7351	Female	Classic	earlytrunc	18.3244	35	33	0.89	NA
7357	Female	Classic	R306C	5.9959	19	25	0.86	NA
7359	Female	Classic	R168X	7.0198	27	26	0.36	77
7393	Female	Classic	CTT	15.4552	28	25	0.7	NA
7395	Female	Classic	R255X	3.3046	21	26	0.41	NA
7396	Female	Classic	T158M	15.8768	19	17	0.14	NA
7402	Female	Classic	LargeDel	18.1985	22	19	0.22	NA
7403	Female	Classic	T158M	23.2361	14	13	0.03	NA
7405	Female	Atypical/variant unspecified Rett syndrome	earlytrunc	2.7488	24	30	0.72	66
7422	Female	Classic	R255X	14.1711	29	28	0.5	NA
7430	Female	Classic	CTT	7.6413	18	20	0.36	NA
7431	Female	Other MECP2 mutation-positive Non-Rett (including normal phenotype)	CTT	8.3888	2	5	0	NA
7435	Female	Other MECP2 mutation-positive Non-Rett (including normal phenotype)	LargeDel	2.7488	21	22	0.32	NA
7439	Female	Variant	CTT	12.5969	14	12	0.04	NA
7442	Female	Classic	R133C	4.0684	15	20	0.49	NA
7459	Female	Classic	T158M	3.6331	17	21	0.27	NA
7474	Female	Classic	R294X	11.9343	19	18	0.32	NA
7483	Female	Classic	R306C	6.9706	7	10	0.01	NA
7486	Female	Other MECP2 mutation-positive Non-Rett (including normal phenotype)	LargeDel	10.193	26	25	0.5	NA
7498	Female	Classic	R270X	21.6099	37	34	0.84	NA
7501	Female	Classic	R255X	3.0582	18	33	0.75	57
7513	Female	Classic	R306C	2.8501	20	26	0.93	NA
7521	Female	Classic	R306C	3.5209	18	22	0.64	NA
7525	Female	Classic	R306C	3.5154	14	20	0.49	70
7529	Female	Classic	R306C	11.666	21	21	0.54	NA
7541	Female	Classic	LargeDel	11.6934	34	33	0.83	NA
7542	Female	Other MECP2 mutation-positive Non-Rett (including normal phenotype)	CTT	4.6133	7	6	0	NA
7549	Female	Classic	R294X	2.6475	19	33	1	47
7551	Female	Classic	T158M	13.8042	30	29	0.76	NA
7558	Female	Classic	R168X	17.2183	15	16	0.03	NA
7575	Female	Classic	R168X	3.4689	18	21	0.12	NA
7589	Female	Classic	R168X	2.4066	22	33	0.79	NA
7595	Female	Atypical/variant unspecified Rett syndrome	R306C	7.1869	8	12	0.05	NA
7596	Female	Classic	R270X	5.5962	22	23	0.22	NA
7600	Female	Classic	R133C	7.4798	17	17	0.3	NA
7606	Female	Classic	earlytrunc	19.1239	24	28	0.55	94
7635	Female	Classic	R168X	3.4634	28	33	0.79	NA
7656	Female	Classic	CTT	2.037	19	32	0.94	NA
7661	Female	Classic	CTT	4.1643	21	23	0.54	NA
7677	Female	Classic	R306C	8.397	31	27	0.93	NA
7681	Female	Classic	earlytrunc	3.2444	19	21	0.22	NA
7688	Female	Classic	LargeDel	3.3676	32	31	0.77	NA
7700	Female	Classic	R306C	13.9138	28	26	0.93	NA
7706	Female	Variant	R294X	4.6543	7	14	0.11	NA
7715	Female	Variant	CTT	8.7748	5	8	0	NA
7735	Female	Classic	R306C	9.2485	18	19	0.39	NA
7736	Female	Classic	LargeDel	12.1889	36	35	0.94	NA
7744	Female	Classic	R306C	3.1567	14	20	0.49	NA
7757	Female	Atypical Preserved Speech (Zapella) Variant Rett syndrome	CTT	9.5058	4	6	0	NA
7769	Female	Classic	LargeDel	2.9103	21	25	0.5	NA
7776	Female	Classic	CTT	18.3573	29	26	0.76	NA
7790	Female	Classic	CTT	10.4531	12	13	0.07	NA
7795	Female	Classic	T158M	2.4175	16	29	0.76	87
7800	Female	Classic	CTT	14.1766	20	17	0.23	NA
7801	Female	Classic	R133C	21.3826	18	15	0.17	NA
7804	Female	Classic	R133C	16.219	24	22	0.64	NA
7810	Female	Classic	earlytrunc	6.1574	20	22	0.25	NA
7812	Female	Classic	R255X	2.6968	19	28	0.5	NA
7818	Female	Classic	R270X	11.6906	33	32	0.7	NA
7836	Female	Classic	LargeDel	9.4155	27	28	0.64	NA
7838	Female	Classic	T158M	3.7262	13	18	0.16	NA
7847	Female	Classic	R255X	6.5407	26	24	0.23	NA
7854	Female	Classic	earlytrunc	7.8056	27	28	0.55	NA
7862	Female	Classic	T158M	5.681	15	21	0.27	NA
7865	Female	Classic	R306C	23.6934	25	22	0.64	NA
7869	Female	Classic	R255X	1.9713	29	39	0.98	NA
7871	Female	Classic	R168X	14.3929	33	31	0.68	NA
7874	Female	Classic	R255X	3.4552	23	29	0.56	NA
7877	Female	Other Non-Rett	earlytrunc	5.4292	1	3	0	NA
7880	Female	Classic	earlytrunc	3.1266	29	27	0.49	NA
7895	Female	Classic	R270X	7.3128	33	33	0.76	NA
7896	Female	Classic	R255X	2.6311	26	34	0.85	48
7932	Female	Classic	R255X	2.4093	21	26	0.41	NA
7941	Female	Classic	R168X	5.3388	19	29	0.61	NA
7946	Female	Other MECP2 mutation-positive Non-Rett (including normal phenotype)	CTT	6.4038	11	15	0.15	NA
7955	Female	Classic	R168X	10.9952	34	33	0.79	NA
7960	Female	Classic	T158M	4.1971	23	25	0.5	NA
7974	Female	Variant	LargeDel	1.7358	16	25	0.5	NA
7980	Female	Classic	CTT	5.2129	20	24	0.63	NA
7985	Female	Classic	R306C	19.1513	10	9	0.01	49
7996	Female	Classic	R133C	2.9131	15	24	0.77	NA
7997	Female	Classic	R294X	6.5572	21	28	0.85	NA
8003	Female	Classic	R168X	6.8446	23	25	0.3	NA
8016	Female	Variant	R270X	3.1157	28	27	0.37	NA
8018	Female	Classic	R270X	4.4846	15	19	0.12	NA
8020	Female	Classic	R270X	23.3402	35	32	0.7	NA
8031	Female	Classic	R168X	3.8056	31	32	0.71	NA
8033	Female	Classic	T158M	21.807	29	25	0.5	NA
8039	Female	Classic	R294X	5.8645	17	20	0.54	NA
8080	Female	Other MECP2 mutation-positive Non-Rett (including normal phenotype)	R168X	2.3491	25	31	0.68	NA
8114	Female	Classic	earlytrunc	1.7687	31	35	0.96	NA
8120	Female	Classic	R294X	8.2163	28	29	0.94	31
8126	Female	Classic	R106W	7.7974	17	20	0.14	91
8139	Female	Classic	R306C	5.3908	17	20	0.49	NA
8141	Female	Classic	CTT	6.0205	13	17	0.23	NA
8144	Female	Classic	R133C	8.4189	27	24	0.77	NA
8146	Female	Classic	LargeDel	1.9302	26	28	0.64	NA
8151	Female	Classic	CTT	4.4244	16	25	0.7	NA
8152	Female	Variant	CTT	2.4285	21	24	0.63	NA
8164	Female	Classic	R255X	2.6092	20	28	0.5	NA
8168	Female	Classic	CTT	4.6461	23	25	0.7	NA
8179	Female	Classic	T158M	8.2053	18	19	0.18	NA
8186	Female	Classic	earlytrunc	17.9001	29	27	0.49	NA
8222	Female	Classic	T158M	7.102	9	13	0.03	NA
8232	Female	Classic	R133C	7.4853	30	32	0.99	NA
8237	Female	Classic	T158M	9.9548	37	36	0.98	NA
8240	Female	Classic	R306C	22.6776	15	14	0.11	NA
8247	Female	Variant	LargeDel	3.655	25	26	0.53	NA
8260	Female	Classic	R270X	5.5414	27	25	0.31	NA
8265	Female	Classic	R294X	19.3238	18	18	0.32	NA
8266	Female	Classic	R294X	10.4394	14	15	0.14	NA
8273	Female	Other Non-Rett	CTT	3.1157	1	3	0	13
8281	Female	Classic	T158M	2.4312	23	19	0.18	72
8296	Female	Classic	LargeDel	9.1718	38	38	0.97	NA
8324	Female	Classic	CTT	7.3457	26	32	0.94	NA
8333	Female	Classic	LargeDel	2.6338	16	17	0.13	NA
8350	Female	Classic	R133C	2.3737	14	22	0.64	NA
8351	Female	Variant	R255X	3.1759	29	32	0.7	NA
8354	Female	Classic	R255X	3.0335	19	25	0.32	NA
8365	Female	Classic	LargeDel	18.8309	25	24	0.46	NA
8366	Female	Other MECP2 mutation-positive Non-Rett (including normal phenotype)	CTT	5.9138	9	11	0.03	NA
8385	Female	Classic	LargeDel	3.0089	25	21	0.26	NA
8390	Female	Classic	R106W	4.2628	20	24	0.34	NA
8409	Female	Classic	T158M	4.1095	21	24	0.48	NA
8417	Female	Classic	earlytrunc	4.6078	14	20	0.16	77
8422	Female	Atypical/variant unspecified Rett syndrome	R133C	17.0815	9	7	0	NA
8431	Female	Classic	R270X	8.6297	26	27	0.37	62
8434	Female	Classic	R294X	4.7337	21	26	0.78	NA
8444	Female	Classic	T158M	11.7399	28	30	0.83	NA
8450	Female	Classic	CTT	3.0253	24	34	0.99	NA
8454	Female	Classic	CTT	6.0945	33	32	0.94	NA
8465	Female	Classic	CTT	5.5743	19	23	0.54	NA
8467	Female	Variant	CTT	4.3806	30	36	1	NA
8474	Female	Classic	CTT	14.7871	33	30	0.9	NA
8479	Female	Classic	R270X	18.4148	22	22	0.18	NA
8489	Female	Classic	LargeDel	6.204	19	24	0.46	NA
8507	Female	Classic	T158M	13.8973	14	14	0.04	NA
8512	Female	Classic	R270X	11.5264	27	29	0.54	NA
8516	Female	Classic	earlytrunc	15.5346	33	32	0.84	NA
8530	Female	Classic	LargeDel	5.0869	11	14	0.04	NA
8536	Female	Classic	CTT	7.2389	22	24	0.63	NA
8539	Female	Classic	R133C	24.5503	14	12	0.07	NA
8562	Female	Classic	earlytrunc	22.7871	35	32	0.84	NA
8584	Female	Classic	R255X	7.1348	26	27	0.46	NA
8592	Female	Classic	R255X	2.0561	23	30	0.61	NA
8594	Female	Classic	R294X	5.9932	23	26	0.78	83
8603	Female	Classic	CTT	19.7317	26	22	0.47	NA
8606	Female	Classic	R255X	2.4997	22	31	0.66	66
8610	Female	Classic	R306C	18.7953	14	15	0.18	NA
8625	Female	Classic	R255X	5.6482	32	30	0.61	NA
8649	Female	Classic	R306C	3.1923	14	21	0.54	NA
8650	Female	Classic	earlytrunc	2.0698	23	28	0.55	NA
8653	Female	Other MECP2 mutation-positive Non-Rett (including normal phenotype)	R133C	9.8617	3	4	0	NA
8656	Female	Atypical/variant unspecified Rett syndrome	CTT	4.2601	28	30	0.9	NA
8658	Female	Classic	LargeDel	15.9042	28	29	0.72	NA
8662	Female	Classic	CTT	2.6366	16	20	0.36	NA
8663	Female	Classic	R270X	5.7413	25	28	0.43	NA
8672	Female	Classic	earlytrunc	16.3915	28	28	0.55	NA
8682	Female	Classic	CTT	1.8453	27	29	0.85	NA
8684	Female	Atypical/variant unspecified Rett syndrome	R168X	14.8063	34	32	0.71	NA
8700	Female	Classic	R306C	6.9158	13	15	0.18	NA
8705	Female	Classic	R133C	21.2348	16	14	0.13	45
8708	Female	Classic	R255X	4.5695	32	35	0.89	80
8722	Female	Classic	R306C	3.9699	15	23	0.73	88
8743	Female	Classic	LargeDel	24	27	23	0.4	86
8744	Female	Classic	R168X	2.2642	30	36	0.91	NA
8745	Female	Classic	R294X	3.7153	20	28	0.85	NA
8746	Female	Classic	R270X	2.7324	15	21	0.13	85
8751	Female	Variant	R168X	9.1088	29	33	0.79	NA
8762	Female	Variant	R133C	3.6057	16	15	0.17	NA
8768	Female	Classic	earlytrunc	2.2642	17	21	0.22	NA
8780	Female	Classic	R168X	5.5661	25	24	0.23	79
8783	Female	Variant	R133C	9.4538	18	19	0.43	NA
8798	Female	Classic	R270X	2.1027	25	28	0.43	NA
8802	Female	Other Non-Rett	CTT	9.7221	9	12	0.04	NA
8806	Female	Classic	T158M	6.4832	18	21	0.27	NA
8826	Female	Classic	CTT	2.5489	19	24	0.63	NA
8830	Female	Atypical/variant unspecified Rett syndrome	R270X	7.551	20	24	0.28	NA
8843	Female	Classic	R306C	2.2752	16	24	0.76	NA
8848	Female	Classic	T158M	2.9678	22	25	0.5	NA
8851	Female	Classic	LargeDel	9.399	34	33	0.83	NA
8852	Female	Atypical/variant unspecified Rett syndrome	earlytrunc	2.3409	22	22	0.25	NA
8854	Female	Classic	T158M	2.7543	16	16	0.08	NA
8863	Female	Classic	R168X	3.8494	22	28	0.55	83
8880	Female	Classic	T158M	6.6557	27	27	0.62	NA
8900	Female	Classic	R168X	3.3977	18	25	0.3	84
8907	Female	Classic	R306C	4.627	12	14	0.11	NA
8909	Female	Classic	T158M	8.3915	32	34	0.92	NA
8911	Female	Classic	R168X	2.7242	14	20	0.1	NA
8927	Female	Classic	R168X	3.7618	26	25	0.3	NA
8931	Female	Classic	R294X	12.4517	22	20	0.54	NA
8934	Female	Classic	CTT	11.7974	22	21	0.41	NA
8942	Female	Classic	R168X	4.6461	22	27	0.45	NA
8947	Female	Variant	CTT	3.4278	21	24	0.63	NA
8969	Female	Classic	CTT	14.4422	24	26	0.76	NA
8983	Female	Classic	CTT	2.5736	24	33	0.96	NA
8998	Female	Classic	earlytrunc	3.2361	30	32	0.84	NA
9008	Female	Classic	R255X	3.4278	14	24	0.23	85
9009	Female	Classic	earlytrunc	11.1266	28	30	0.72	NA
9043	Female	Classic	LargeDel	19.4825	31	29	0.72	NA
9050	Female	Classic	earlytrunc	1.5168	18	27	0.49	NA
9076	Female	Other Non-Rett	LargeDel	1.8563	20	19	0.22	NA
9082	Female	Classic	LargeDel	7.165	25	29	0.72	30
9088	Female	Classic	R133C	6.8912	20	20	0.49	NA
9093	Female	Classic	LargeDel	5.6126	25	29	0.72	NA
9094	Female	Classic	LargeDel	2.4148	29	23	0.4	NA
9128	Female	Classic	R133C	24.2026	21	17	0.3	NA
9129	Female	Classic	T158M	10.5845	21	22	0.33	86
9147	Female	Other Non-Rett	R306C	9.3142	7	7	0	NA
9152	Female	Classic	CTT	3.0144	15	20	0.36	NA
9154	Female	Classic	LargeDel	4.4736	21	23	0.4	NA
9164	Female	Variant	R168X	3.0034	26	34	0.86	NA
9171	Female	Classic	T158M	13.243	32	28	0.67	NA
9204	Female	Classic	R168X	2.6311	30	29	0.61	48
9206	Female	Classic	R106W	7.4661	18	18	0.03	NA
9207	Female	Classic	T158M	2.4312	26	33	0.9	NA
9209	Female	Classic	R168X	5.3498	18	23	0.2	71
9219	Female	Classic	R294X	3.4141	13	23	0.66	NA
9223	Female	Classic	earlytrunc	2.1136	19	24	0.36	84
9231	Female	Classic	R270X	2.924	18	24	0.28	NA
9235	Female	Classic	R133C	6.1656	9	14	0.13	48
9257	Female	Classic	T158M	4.449	14	16	0.08	NA
9272	Female	Classic	T158M	4.6598	18	21	0.27	NA
9279	Female	Classic	R255X	8.1095	27	28	0.5	NA
9284	Female	Classic	R133C	5.681	26	27	0.89	NA
9287	Female	Classic	T158M	20.1834	25	23	0.4	NA
9288	Female	Classic	LargeDel	3.6441	16	16	0.1	63
9289	Female	Atypical Congenital (Rolando) Variant Rett syndrome	R270X	10.5079	34	32	0.7	NA
9290	Female	Classic	T158M	6.204	25	28	0.67	NA
9291	Female	Atypical Congenital (Rolando) Variant Rett syndrome	R133C	4.0356	9	13	0.09	NA
9294	Female	Classic	R255X	10.4668	28	32	0.7	NA
9299	Female	Classic	R106W	3.3128	20	25	0.43	NA
9304	Female	Classic	LargeDel	3.5756	24	27	0.58	89
9311	Female	Classic	R168X	3.7673	29	33	0.79	61
9316	Female	Classic	R106W	3.2005	21	24	0.34	NA
9322	Female	Classic	earlytrunc	15.9343	40	38	0.98	NA
9324	Female	Classic	R306C	12.3669	19	17	0.35	NA
9333	Female	Atypical/variant unspecified Rett syndrome	CTT	2.8337	10	10	0.01	NA
9336	Female	Classic	R306C	5.6619	16	21	0.54	NA
9342	Female	Classic	R106W	3.0418	14	24	0.34	NA
9361	Female	Classic	earlytrunc	4.1177	19	13	0.02	NA
9368	Female	Classic	T158M	2.935	20	24	0.48	NA
9373	Female	Classic	CTT	4.8843	20	24	0.63	NA
9415	Female	Classic	LargeDel	3.1047	18	22	0.32	NA
9423	Female	Classic	CTT	7.9973	19	21	0.41	NA
9424	Female	Classic	R255X	2.8857	20	28	0.5	NA
9437	Female	Atypical/variant unspecified Rett syndrome	CTT	2.1136	10	19	0.31	17
9440	Female	Classic	earlytrunc	2.4422	25	30	0.72	NA
9447	Female	Classic	T158M	3.4114	39	42	1	NA
9450	Female	Variant	R255X	2.0698	21	25	0.32	58
9452	Female	Classic	R270X	2.6721	23	31	0.61	NA
9470	Female	Classic	R255X	10.4504	34	33	0.75	NA
9473	Female	Classic	CTT	23.8138	18	14	0.1	NA
9476	Female	Classic	CTT	5.4839	20	23	0.54	NA
9483	Female	Classic	R294X	4.5749	22	28	0.85	NA
9487	Female	Classic	LargeDel	2.5325	27	27	0.58	NA
9508	Female	Classic	R255X	4.219	20	27	0.46	89
9520	Female	Classic	earlytrunc	1.8426	25	24	0.36	NA
9528	Female	Variant	CTT	9.1362	10	11	0.03	NA
9550	Female	Classic	CTT	14.4805	16	17	0.23	NA
9560	Female	Classic	R168X	15.3347	34	31	0.68	NA
9579	Female	Classic	T158M	3.6194	14	19	0.18	NA
9582	Female	Classic	T158M	20.0548	10	12	0	NA
9584	Female	Classic	earlytrunc	3.0281	17	22	0.25	80
9607	Female	Classic	CTT	15.1321	19	18	0.28	NA
9630	Female	Classic	LargeDel	2.8528	20	25	0.5	NA
9642	Female	Classic	earlytrunc	10.6913	32	31	0.79	NA
9658	Female	Classic	CTT	10.6667	24	26	0.76	85
9675	Female	Classic	CTT	8.0903	27	29	0.85	NA
9677	Female	Variant	CTT	14.4586	10	6	0	NA
9681	Female	Atypical Congenital (Rolando) Variant Rett syndrome	R306C	23.1704	12	12	0.05	NA
9683	Female	Classic	R168X	4.3149	21	24	0.23	NA
9691	Female	Classic	R255X	2.2231	19	25	0.32	58
9693	Female	Classic	R168X	5.8261	37	32	0.71	NA
9694	Female	Classic	R306C	7.6988	15	16	0.29	NA
9734	Female	Classic	LargeDel	17.2977	39	36	0.95	NA
9754	Female	Atypical/variant unspecified Rett syndrome	CTT	4.5366	10	15	0.15	NA
9768	Female	Atypical/variant unspecified Rett syndrome	R133C	9.9001	11	10	0.01	NA
9780	Female	Classic	R294X	3.6085	20	28	0.85	NA
9785	Female	Classic	earlytrunc	4.8898	12	14	0.03	NA
9813	Female	Classic	CTT	2.6557	24	33	0.96	NA
9816	Female	Classic	R106W	6.4832	18	20	0.14	NA
9818	Female	Classic	R294X	7.7235	14	17	0.22	61
9819	Female	Classic	LargeDel	4.5832	14	18	0.16	NA
9828	Female	Classic	R168X	2.8419	22	21	0.12	NA
9844	Female	Classic	R255X	6.2259	29	33	0.75	NA
9847	Female	Classic	earlytrunc	7.9863	30	29	0.63	NA
9851	Female	Variant	R306C	2.8802	10	23	0.73	NA
9863	Female	Atypical/variant unspecified Rett syndrome	R294X	4.2464	14	18	0.32	NA
9864	Female	Classic	earlytrunc	9.5934	19	17	0.1	NA
9866	Female	Classic	earlytrunc	3.9316	22	25	0.44	NA
9870	Female	Atypical/variant unspecified Rett syndrome	R306C	3.2745	14	20	0.49	68
9875	Female	Classic	R133C	2.5298	17	23	0.7	NA
9886	Female	Classic	R106W	5.8179	23	26	0.46	NA
9891	Female	Classic	LargeDel	13.2238	36	34	0.87	NA
9900	Female	Classic	LargeDel	8.0903	16	18	0.16	NA
9903	Female	Classic	R168X	15.0527	37	33	0.79	83
9911	Female	Classic	LargeDel	18.6913	42	34	0.87	NA
9918	Female	Classic	earlytrunc	19.603	38	35	0.96	NA
9921	Female	Classic	LargeDel	2.2505	18	29	0.72	56
9927	Female	Classic	R306C	9.8316	19	21	0.54	NA
9930	Female	Classic	R294X	11.9179	24	23	0.66	NA
9932	Female	Classic	R255X	9.4867	29	30	0.61	NA
9934	Female	Classic	R294X	19.0773	21	20	0.54	NA
9936	Female	Variant	R106W	3.5921	25	29	0.66	NA
9937	Female	Classic	R168X	13.0979	35	32	0.71	NA
9940	Female	Classic	R255X	2.2341	23	35	0.89	32
9942	Female	Classic	R255X	6.1875	24	27	0.46	NA
9946	Female	Classic	LargeDel	4.0986	26	27	0.58	NA
9951	Female	Classic	R255X	13.6427	30	29	0.56	NA
9953	Female	Atypical/variant unspecified Rett syndrome	LargeDel	2.0945	23	22	0.32	NA
9973	Female	Variant	R294X	2.8775	17	27	0.85	NA
9975	Female	Classic	R106W	16.5038	31	27	0.63	90
9989	Female	Classic	T158M	7.7043	26	24	0.48	NA
9998	Female	Classic	R133C	14.6037	13	12	0.07	NA
